# Supplementary material for: Label-free functional and structural imaging of liver microvascular complex in mice by Jones matrix optical coherence tomography
Source: PubMed Central journal article supplement (PMC8501041; doi:10.1038/s41598-021-98909-6), 2021-10-08
Supplement: 41598_2021_98909_MOESM2_ESM.pdf [file 41598_2021_98909_MOESM2_ESM.pdf]

## Supplementary material 2

### Label-free functional and structural imaging of liver microvascular complex in mice by Jones matrix optical coherence tomography

Pradipta Mukherjee<sup>1</sup>, Arata Miyazawa<sup>1</sup>, Shinichi Fukuda<sup>2,3</sup>, Toshiharu Yamashita<sup>4</sup>, Donny Lukmanto<sup>3</sup>, Kosuke Okada<sup>5</sup>, Ibrahim Abd El-Sadek<sup>1,6</sup>, Lida Zhu<sup>1</sup>, Shuichi Makita<sup>1</sup>, Tetsuro Oshika<sup>2</sup>, and Yoshiaki Yasuno<sup>1</sup>

<sup>1</sup>Computational Optics Group, University of Tsukuba, Tsukuba, Ibaraki, Japan

<sup>2</sup>Department of Ophthalmology, Faculty of Medicine, University of Tsukuba, Tsukuba, Ibaraki, Japan

<sup>3</sup>Department of Advanced Vision Science, Faculty of Medicine, University of Tsukuba, Tsukuba, Ibaraki, Japan

<sup>4</sup>Laboratory of Regenerative Medicine and Stem Cell Biology, Graduate School of Comprehensive Human Sciences, University of Tsukuba, Tsukuba, Ibaraki, Japan

<sup>5</sup>Division of Medical Sciences, Faculty of Medicine, University of Tsukuba, Tsukuba, Ibaraki, Japan

<sup>6</sup>Department of Physics, Faculty of Science, Damietta University, 34517 New Damietta City, Damietta, Egypt

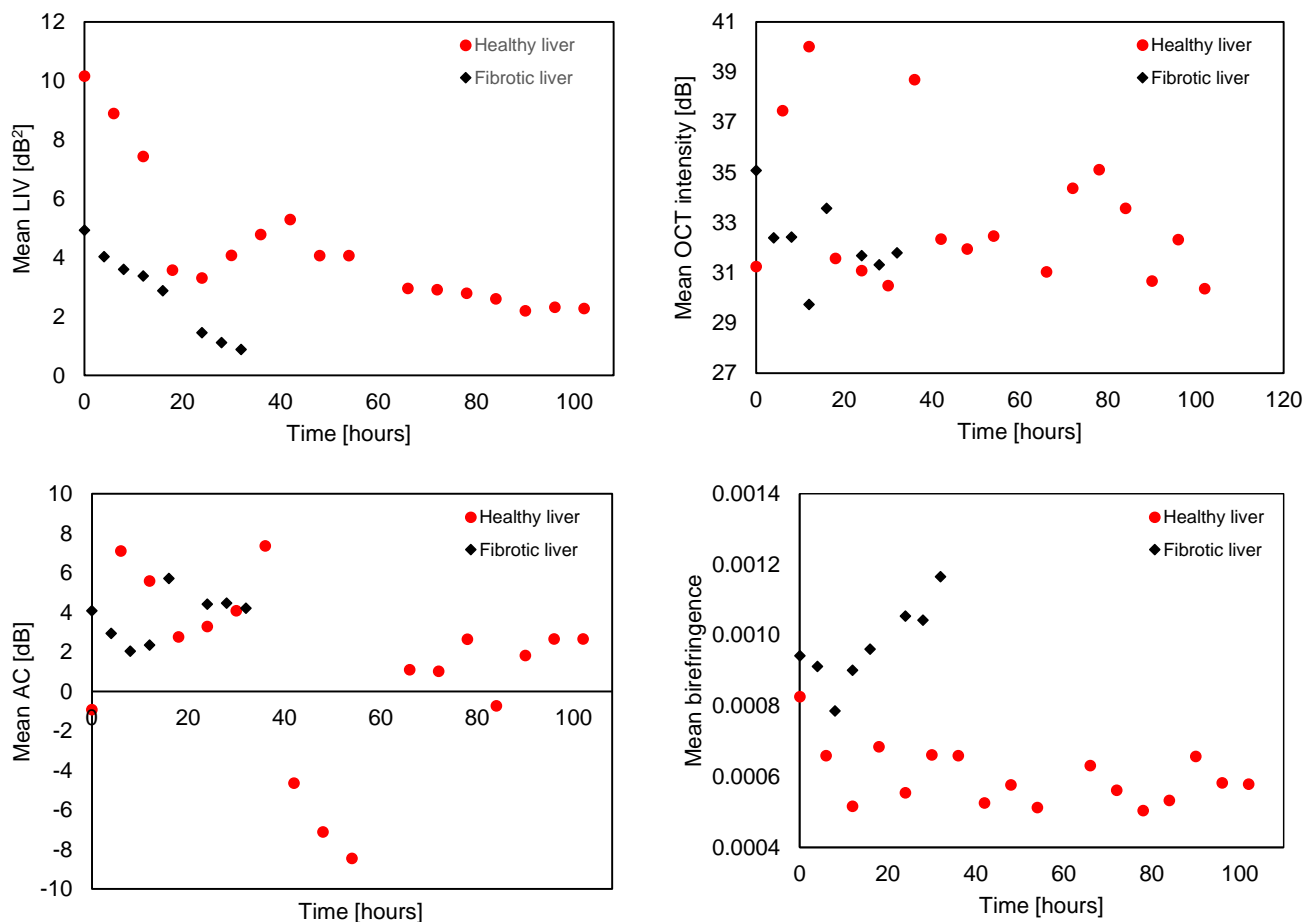

Figure S2: Comparison of mean LIV, OCT intensity, AC, and birefringence between healthy and fibrotic mouse livers.
